# Supplementary material for: Probing biomass mimic guaiacol confinement and interactions in ZSM-5 zeolite
Source: Royal Society of Chemistry journal article supplement (doi:10.1039/d6qm00172f), 2026-05-21
Supplement: d6qm00172f1.pdf [file d6qm00172f1.pdf]

## Supporting Information

### Probing Biomass Mimic Guaiacol Confinement and Interactions in ZSM-5 Zeolite

*Kyle A. Watson,<sup>a</sup> Ming-Feng Hsieh,<sup>b</sup> Stephen Day,<sup>c</sup> Luke Tuxworth,<sup>b</sup> and Frédéric Blanc<sup>\*a,d,e</sup>*

<sup>a</sup> Department of Chemistry, University of Liverpool, Liverpool L69 7ZD, UK

<sup>b</sup> Johnson Matthey Technology Centre, Billingham TS23 1LB, UK

<sup>c</sup> Johnson Matthey Technology Centre, Sonning Common RG4 9NH, UK

<sup>d</sup> Stephenson Institute for Renewable Energy, University of Liverpool, Liverpool L69 7ZF, UK

<sup>e</sup> Leverhulme Research Centre for Functional Materials Design, University of Liverpool,  
Liverpool L7 3NY, UK

\* Corresponding author's email: [frederic.blanc@liverpool.ac.uk](mailto:frederic.blanc@liverpool.ac.uk)

## **Experimental Section**

### **Sample Preparation**

Guaiacol (99+%) and silicon carbide (SiC) powder (100 %, particle size = 340  $\mu\text{m}$ ) were purchased from ThermoFischer Scientific. 60%  $^{17}\text{O}$  enriched  $\text{O}_2$  gas was obtained from Isotec. ZSM-5 ( $\text{SiO}_2/\text{Al}_2\text{O}_3 = 34$ , particle size < 5  $\mu\text{m}$ ) was supplied by Johnson Matthey.

Guaiacol adsorbed ZSM-5 was prepared at room temperature by adding guaiacol (ranging from 4.5-45.0  $\mu\text{L}$ ) dropwise over 10 seconds to ZSM-5 (200 mg) in a vial and then shaken to ensure homogenisation. Guaiacol loadings were chosen corresponding to 10, 25, 50 and 100 % of the volume employed for the pyrolysis activation process. Ar gas adsorption for Am-NatA-ZSM-5 (Table S3) report a pore volume of 0.24  $\text{cm}^3\text{g}^{-1}$ ; based on this pore volume, the guaiacol loadings correspond to 9, 23, 47 and 94% of the theoretical pore volume, respectively.

Guaiacol activated ZSM-5: Under air, ZSM-5 (200 mg) and SiC (400 mg) were layered in a quartz tube on top of a built-in sintered quartz disc, then placed within a furnace which temperature was ramped from room temperature to 500 or 600  $^\circ\text{C}$  (see below) at 10  $^\circ\text{C}/\text{min}$ . ZSM-5 was first heated at target temperature for 45 min to dehydrate under air before Ar gas was flowed through the tube at 425  $\text{mL}/\text{min}$  for 15 min. Guaiacol (50 mg, 45  $\mu\text{L}$ , 1:4 guaiacol:ZSM-5 weight ratio) was injected with a micro-syringe into the Ar gas flow on top of the reactor. After the desired collection period (30-60 seconds), the furnace heating elements were then withdrawn allowing the sample to cool quickly to approximately 60  $^\circ\text{C}$  in under an estimated 30 s. The flow of Ar gas was then discontinued, and the sample collected and sieved to separate the post-reaction ZSM-5 from the SiC particles. Reaction products are collected in a vial at the end of the reactor brought to low temperatures in an ice bath.

Dehydrated ZSM-5 was obtained by heating under dynamic vacuum at 10 mbar using the following temperatures that minimise dealumination:<sup>1</sup> ZSM-5 was heated at 1  $^\circ\text{C}/\text{min}$  to 50  $^\circ\text{C}$  and then held for 1 hour, then ramped to 100  $^\circ\text{C}$  and held for 1 hour and finally ramped to 300  $^\circ\text{C}$  and held for 10.5 hours. The samples were then isolated at 300 $^\circ\text{C}$  and allowed to cool naturally in the furnace to room temperature under static vacuum. Samples were packed in a MBraun LabMaster 130 glovebox ( $\text{O}_2$ ,  $\text{H}_2\text{O} \leq 1.0$  ppm) under an Ar atmosphere.

$^{17}\text{O}$  enriched ZSM-5 was prepared by exposing dehydrated ZSM-5 (as described above) to 60%  $^{17}\text{O}$  enriched  $\text{O}_2$  gas in a closed quartz tube heated to either 300, 500 or 700  $^\circ\text{C}$  for 16 hours at a heating ramp rate of 1  $^\circ\text{C}/\text{min}$ . After the heating period, the tube was allowed to cool naturally in the furnace to room temperature.

### **Solid State NMR Spectroscopy**

NMR experiments were recorded at various field strengths on a number of spectrometers as indicated. Experiments at 9.4 T used a Bruker Avance III HD spectrometer with a Bruker 4 mm HXY MAS probe in double resonance (DR) mode, at 18.8 T a Bruker Avance NEO spectrometer equipped with a Bruker 1.3 mm HXY MAS probe in DR mode, at 20.0 T a Bruker Avance NEO spectrometer with a Bruker 3.2 mm HXY MAS probe in DR mode, a 23.5 T a Bruker Avance NEO spectrometer with a Bruker 3.2 mm HX MAS probe.

1D  $^1\text{H}$  NMR spectrum of neat guaiacol were obtained under MAS at 220 Hz at 9.4 T with the one pulse experiment. The  $^1\text{H}$  MAS spectra of ambient moisture ZSM-5, guaiacol adsorbed ZSM-5 and guaiacol activated ZSM-5 were obtained at 18.8 T under MAS at 60 kHz with the Hahn echo experiment (10 rotor periods were used to reduce the  $^1\text{H}$  background signal). The  $^1\text{H}$  MAS spectra

of dehydrated ZSM-5 were obtained at 20.0 T under MAS at 16 kHz with the Hahn echo experiment (4 rotor periods to reduce  $^1\text{H}$  background signal).  $^1\text{H}$  NMR experiments used an experimentally optimised flip angle of  $90^\circ$  with a pulse duration of  $5.0\ \mu\text{s}$  at a radiofrequency (rf) amplitude of 50 kHz (with the exception of Am-NatA-ZSM-5 and the ZSM-5 samples with various amount of guaiacol adsorbed in Figure 1 which used an experimentally optimised flip angle of  $90^\circ$  with a pulse duration of  $2.0\ \mu\text{s}$  at a rf amplitude of 125 kHz). All 1D  $^1\text{H}$  NMR experiments used a recycle delay of  $5 \times T_1$  (4-20s dependant on sample) for quantitative measurements.  $T_1$  values were determined by saturation recovery experiments performed with a saturation block consisting of a train of 100 pulses separated by a delay of 1 ms. The resulting normalised data were fit using the equation

$$I(t) = 1 - \exp \left[ - \left( \frac{\tau_1}{T_1} \right)^{\alpha_1} \right] \quad (1)$$

where  $I(t)$  is the magnetization at time  $t$ ,  $\tau_1$  the variable delay for magnetization build up and  $\alpha_1$  the stretch exponential to account for a distribution of values.  $T_2$  values were determined by performing a series of Hahn echo experiments with increasing rotor-synchronised echo delays. The resulting normalised data were fit using the equation

$$I(t) = \exp \left[ - \left( \frac{\tau_2}{T_2} \right)^{\alpha_2} \right] \quad (2)$$

where  $I(t)$  is the magnetization at time  $t$ ,  $\tau_2$  the variable echo delay and  $\alpha_2$  the stretch exponential to account for a distribution of values.

A  $^1\text{H}$  2D Exchange Spectroscopy (EXSY) NMR spectrum<sup>2</sup> was obtained at 18.8 T under MAS at 60 kHz. Pulses were used with an experimentally optimised flip angle of  $90^\circ$  with a duration of  $2.0\ \mu\text{s}$  at a rf amplitude of 125 kHz. 4096 rotor-synchronized  $t_1$  increments (1 rotor period) and a mixing time of 20 ms were used. A recycle delay of  $1.3 \times T_1$  was used to maximise signal to noise per unit time.

$^1\text{H}$  - $^{13}\text{C}$  Cross-Polarization CP MAS NMR and heteronuclear correlation (HETCOR) experiments were obtained at 9.4 T under MAS at 10 kHz. The  $^1\text{H}$   $90^\circ$  pulse had a duration of  $3.6\ \mu\text{s}$  at a rf field amplitude of 70 kHz. For CP, a  $^1\text{H}$  rf field amplitude of 60 kHz was used for with a ramped 70-100% pulse on  $^1\text{H}$  to match the Hartman-Hahn condition of  $^{13}\text{C}$  at a rf field amplitude of 47 kHz. SPINAL64 heteronuclear decoupling<sup>3</sup> was used at a rf field amplitude of 70 kHz. A recycle delay of  $1.3 \times T_1$  on  $^1\text{H}$  was used to maximise signal to noise per unit time. For the HETCOR experiment, 16 rotor-synchronized  $t_1$  increments (1 rotor period) were used. The  $^{13}\text{C}$  NMR spectrum of neat guaiacol was obtained at 9.4 T under static conditions and direct  $^{13}\text{C}$  excitation with continuous wave  $^1\text{H}$  decoupling experiment during detection. An experimentally optimised flip angle of  $90^\circ$  of  $5.0\ \mu\text{s}$  at a rf amplitude of 50 kHz was used on  $^{13}\text{C}$ . Continuous wave  $^1\text{H}$  decoupling was used at a rf field amplitude of 40 kHz.

$^{17}\text{O}$  MAS spectra were obtained at 9.4 T, 18.8 T and 20.0 T under MAS at 10, 16 and 20 kHz, respectively. The spectra were obtained using a Hahn echo (1 rotor period) pulse sequence at 9.4 T and 18.8 T and a one pulse experiment at 20.0 T. Experiments at 9.4 T and 20.0 T used optimised flip angles of  $90^\circ$  with pulse durations of  $1.67\ \mu\text{s}$  at a rf amplitude of 50 kHz, with experiments at 18.8 T using a pulse duration of  $2.4\ \mu\text{s}$  at a rf amplitude of 35 kHz. All experiments used a recycle delay of  $5 \times T_1$  (10 s) for quantitative measurements with  $T_1$  determined by saturation recovery experiments and fitted using equation 1 as described above for  $^1\text{H}$ .

2D  $^{17}\text{O}$  multiple-quantum magic angle spinning (MQMAS)<sup>4</sup> experiments were conducted at 9.4 T under MAS at 10 kHz with a z-filter pulse sequence.<sup>5</sup> A rf field amplitude of 100 kHz for the optimised excitation (4.0  $\mu\text{s}$ ) and reconversion pulses (1.5  $\mu\text{s}$ ) and a rf field amplitude of 10 kHz for the  $90^\circ$  central transition selective pulse (8.33  $\mu\text{s}$ ) were used. 36 rotor synchronized (1 rotor period)  $t_1$  increments were used with a recycle delay of 0.2 s to maximize signal to noise per unit time. The isotropic chemical shifts ( $\delta_{\text{CS}}$ ) were determined by extracting the position of the centre of gravity of the resonances projected along the isotropic ( $\delta_1$ ) and anisotropic ( $\delta_2$ ) dimensions of the sheared MQMAS spectra using equation 1.<sup>6</sup>

$$\delta_{\text{CS}} = \frac{17\delta_1 + 10\delta_2}{27} \quad (3)$$

1D  $^{17}\text{O}$  MAS spectra were then fitted with the line shape analysis tool “Sola” in Topspin 4.4.0, to extract the relevant quadrupolar coupling ( $C_Q$ ) and electric field gradient tensor asymmetry parameters ( $\eta_Q$ ).

2D  $^1\text{H}$ - $^{17}\text{O}$  dipolar heteronuclear multiple-quantum coherence (D-HMQC) experiments were conducted at 23.5 T under MAS at 16 kHz using the SR4<sub>21</sub> recoupling sequence on  $^1\text{H}$ .<sup>7</sup> For  $^1\text{H}$ , pulse durations of 3.75 and 7.5  $\mu\text{s}$  at a rf amplitude of 66.7 kHz were used for experimentally optimized  $90^\circ$  and  $180^\circ$  pulses, respectively. SR4<sub>21</sub> recoupling pulses on  $^1\text{H}$  used a rotor-synchronized pulse length of 15.62  $\mu\text{s}$  (1/4 of a rotor period) at a rf field amplitude of 32 kHz as required to match the condition to be  $2 \times \text{MAS}$  rate. For  $^{17}\text{O}$ , pulse durations of 13.9  $\mu\text{s}$  at a rf amplitude of 6 kHz were used for central transition selective pulses. 24 rotor-synchronized  $t_1$  increments (1 rotor period) increments were used with a  $^1\text{H}$  recycle delay of  $1.3 \times T_1$ . Recoupling times from 0.75 to 6.0 ms were used to estimate strength of  $^1\text{H}$ - $^{17}\text{O}$  dipolar coupling constants.

$^{27}\text{Al}$  and  $^{29}\text{Si}$  MAS spectra were obtained at 9.4 T under MAS at 10 kHz.  $^{27}\text{Al}$  and  $^{29}\text{Si}$  spectra were obtained with the one pulse experiment using experimentally optimised flip angles of  $90^\circ$  of pulse durations of 2.1  $\mu\text{s}$  at a rf amplitude of 40 kHz and 6.2  $\mu\text{s}$  at 40 kHz, respectively. All  $^{27}\text{Al}$  and  $^{29}\text{Si}$  experiments used a recycle delay of  $5 \times T_1$  (0.1 and 60 s respectively) for quantitative measurements. For  $^{27}\text{Al}$  the recycle delay was found to be sufficient for quantitative experiments at 0.1 s and no further measurements were taken. For  $^{29}\text{Si}$  the  $T_1$  was measured by saturation recovery experiments and fitted using equation 1 as described above for  $^1\text{H}$ .

Shifts for  $^{17}\text{O}$  and  $^{27}\text{Al}$  are quoted in ppm relative their primary references of water for  $^{17}\text{O}$  (0 ppm) and 1.1 M  $\text{Al}(\text{NO}_3)_3$  in  $\text{D}_2\text{O}$  for  $^{27}\text{Al}$  (0 ppm). These were also used for the rf calibration of these quadrupolar nuclei. Chemical shifts for  $^1\text{H}$ ,  $^{13}\text{C}$  and  $^{29}\text{Si}$  are quoted in ppm relative to their secondary references of adamantane for  $^1\text{H}$  (1.8 ppm) and  $^{13}\text{C}$  (29.45 ppm)<sup>8</sup> and to octakis(trimethylsiloxy)silsesquioxane (Q8M8) for  $^{29}\text{Si}$  (11.5 ppm)<sup>9</sup>.  $^1\text{H}$ ,  $^{13}\text{C}$  and  $^{29}\text{Si}$  are all relative to 0 ppm of their primary reference tetramethylsilane (TMS).

## Numerical Simulations

Simulations of the  $^1\text{H}$ - $^{17}\text{O}$  D-HMQC signal build-up were performed using the SIMPSON simulation package.<sup>10</sup> The SR4<sub>21</sub> recoupling sequence was implemented as described in the literature,<sup>11</sup> which was modified to reproduced the experimental conditions described above. Powder averaging was carried with the  $\gamma$  compute method with 4180 molecular orientations  $\alpha_{\text{MR}} \beta_{\text{MR}}$  using the ZCW algorithm<sup>12</sup> and stepping the Euler angle  $\gamma_{\text{MR}}$  over 100 steps. Build-up curves were calculated for an isolated two-spin  $^1\text{H}$ - $^{17}\text{O}$  system with heteronuclear dipolar coupling constants in the range 100-145 Hz. To assess the influence of homonuclear  $^1\text{H}$ - $^1\text{H}$  interactions on the D-HMQC transfer efficiency and capture the presence of other  $^1\text{H}$  spins,

additional simulations included a third  $^1\text{H}$  spin dipolar-coupled to the first  $^1\text{H}$  nucleus was included with a fixed  $^1\text{H}$ - $^1\text{H}$  dipolar coupling constant of 300 Hz. The  $^{17}\text{O}$  nucleus was treated explicitly using experimentally determined quadrupolar parameters ( $C_Q = 5.3$  MHz and  $\eta_Q = 0.15$ ). These simulations estimate a quantitative interpretation of the experimental build-up behaviour in terms of heteronuclear dipolar coupling strengths and the influence of an additional  $^1\text{H}$  spin.

### **Liquid State NMR Spectroscopy**

$^1\text{H}$  and  $^{13}\text{C}$  NMR spectra of guaiacol in  $\text{CDCl}_3$  were recorded at 9.4 T using a Bruker Avance III HD spectrometer at room temperature with chemical shifts quoted to the residual protons at 7.26 and 77.2 ppm, respectively.

### **GC-MS**

The guaiacol activation products were dissolved in 1 mL of dichloromethane (DCM). The separation of component products was achieved using a DB-5MS column (30 m  $\times$  0.25 mm ID, 0.25  $\mu\text{m}$  film thickness, Agilent Technologies) with a constant flow of 15 mL/min of helium as the carrier gas and with the following temperature program: initial temperature of 50  $^\circ\text{C}$  and held for 2 min, increased by 20  $^\circ\text{C}/\text{min}$  to 300  $^\circ\text{C}$ , and held for 2 min. The injection inlet temperature was 250  $^\circ\text{C}$  and the injection volume was 1  $\mu\text{L}$ , using a split ratio of 10:1.

The products detection was by a Thermofisher Focus Gas Chromatograph, with ISQ Mass Spec using the following settings: transfer line temperature of 300  $^\circ\text{C}$ , source temperature of 300  $^\circ\text{C}$  and a solvent delay of 2 min 50 s. Products were identified by retention time and comparison of mass spectra to the National Institute of Standards and Technology (NIST) library.

### **TGA-MS**

The TGA-MS experiments were performed on a Netzsch TG 209 F1 Libra. Each experiment used approximately 10 mg of sample, which was placed in an alumina crucible and heated from 25  $^\circ\text{C}$  to 700  $^\circ\text{C}$  at a ramp rate of 10  $^\circ\text{C}/\text{min}$ , in an air stream of 20 mL/min. A slight artificial mass increase ( $\approx 0.5\%$  of sample mass) is recorded at the beginning of each experiment due to buoyancy effects of the purge gas density decreasing upon heating.

### **Argon Physisorption**

Ar physisorption was conducted using a Micromeritics 3-Flex analyser. Samples were outgassed at 350  $^\circ\text{C}$  for 15 hours under vacuum prior to analysis. Apparent Brunauer–Emmett–Teller (BET) surface area was derived using the Rouquerol optimisation method. Micropore volume was obtained using the t-plot method. Mesopore volume is quoted as the difference between the pore volume at last point on the adsorption isotherm ( $P/P_0 \sim 0.995$ ) and the micropore volume as derived from the t-plot.

## Additional Data

**Table S1.** Full list of ZSM-5 samples used with their respective abbreviations.

| Full sample description                                      | Abbreviations                   |
|--------------------------------------------------------------|---------------------------------|
| Ambient moisture unenriched ZSM-5                            | Am-NatA-ZSM-5                   |
| Guaiacol activated unenriched ZSM-5 (30s collection period)  | Act-NatA-ZSM-5                  |
| Guaiacol activated unenriched ZSM-5 (300s collection period) | Act300-NatA-ZSM-5               |
| Guaiacol adsorbed ZSM-5 (9% theoretical pore volume filled)  | Ads9-NatA-ZSM-5                 |
| Guaiacol adsorbed ZSM-5 (23% theoretical pore volume filled) | Ads23-NatA-ZSM-5                |
| Guaiacol adsorbed ZSM-5 (47% theoretical pore volume filled) | Ads47-NatA-ZSM-5                |
| Guaiacol adsorbed ZSM-5 (94% theoretical pore volume filled) | Ads94-NatA-ZSM-5                |
| <sup>17</sup> O-enriched (500 °C) guaiacol activated ZSM-5   | Act- <sup>17</sup> O(500)-ZSM-5 |
| Dehydrated unenriched ZSM-5                                  | De-NatA-ZSM-5                   |
| Dehydrated <sup>17</sup> O-enriched ZSM-5 (700 °C)           | De- <sup>17</sup> O(700)-ZSM-5  |
| Ambient moisture <sup>17</sup> O-enriched ZSM-5 (300 °C)     | Am- <sup>17</sup> O(300)-ZSM-5  |
| Ambient moisture <sup>17</sup> O-enriched ZSM-5 (500 °C)     | Am- <sup>17</sup> O(500)-ZSM-5  |
| Ambient moisture <sup>17</sup> O-enriched ZSM-5 (700 °C)     | Am- <sup>17</sup> O(700)-ZSM-5  |

**Table S2:** Comparison of guaiacol <sup>1</sup>H δ<sub>CS</sub> and FWHM between guaiacol in CDCl<sub>3</sub> (Figure S2), guaiacol neat (Figure 2 a), Ads94-Nat-ZSM-5 and Act-Nat-ZSM-5 (Figure 1 b). *T*<sub>1</sub> and *T*<sub>2</sub> values are included for Ads94-Nat-ZSM-5.

|                               |                            | In-pore        |                |                | Ex-pore        |                |                |                |                |
|-------------------------------|----------------------------|----------------|----------------|----------------|----------------|----------------|----------------|----------------|----------------|
|                               |                            |                |                |                |                |                |                |                |                |
| Guaiacol in CDCl <sub>3</sub> | δ <sub>CS</sub> / ppm      | - <sup>a</sup> | - <sup>a</sup> | - <sup>a</sup> | 3.91 ± 0.01    | 5.89 ± 0.01    | 6.91-6.98      |                | 7.01-7.05      |
|                               | FWHM / Hz                  | - <sup>a</sup> | - <sup>a</sup> | - <sup>a</sup> | 1.4 ± 0.1      | 7.9 ± 0.5      | Multiplet      |                | Multi.         |
| Guaiacol Neat (No solvent)    | δ <sub>CS</sub> / ppm      | - <sup>a</sup> | - <sup>a</sup> | - <sup>a</sup> | 3.0 ± 0.1      | - <sup>a</sup> | 6.2 ± 0.1      | 6.3 ± 0.1      | 6.6 ± 0.1      |
|                               | FWHM / Hz                  | - <sup>a</sup> | - <sup>a</sup> | - <sup>a</sup> | 20 ± 3         | - <sup>a</sup> | 24 ± 2         | 33 ± 4         | 24 ± 4         |
| Ads94-Nat-ZSM-5               | δ <sub>CS</sub> / ppm      | - <sup>a</sup> | 3.9 ± 0.1      | 6.9 ± 0.1      | 3.1 ± 0.1      | - <sup>a</sup> | 6.3 ± 0.1      | 6.4 ± 0.1      | 6.6 ± 0.1      |
|                               | FWHM / Hz                  | - <sup>a</sup> | 170 ± 10       | 350 ± 10       | 18 ± 1         | - <sup>a</sup> | 23 ± 4         | 47 ± 2         | 24 ± 2         |
|                               | <i>T</i> <sub>1</sub> / ms | - <sup>a</sup> | 90 ± 5         | 63 ± 3         | 1294 ± 33      | - <sup>a</sup> | 1143 ± 100     | 1424 ± 150     | 1030 ± 70      |
|                               | <i>T</i> <sub>2</sub> / ms | - <sup>a</sup> | 0.82 ± 0.04    | 0.81 ± 0.06    | 18.65 ± 0.83   | - <sup>a</sup> | 15.31 ± 2.20   | 11.93 ± 1.50   | 8.56 ± 1.16    |
| Act-Nat-ZSM-5                 | δ <sub>CS</sub> / ppm      | 2.3 ± 0.1      | 3.9 ± 0.1      | 6.9 ± 0.1      | - <sup>a</sup> |
|                               | FWHM / Hz                  | 310 ± 20       | 240 ± 20       | 500 ± 20       | - <sup>a</sup> |

<sup>a</sup> Not applicable.

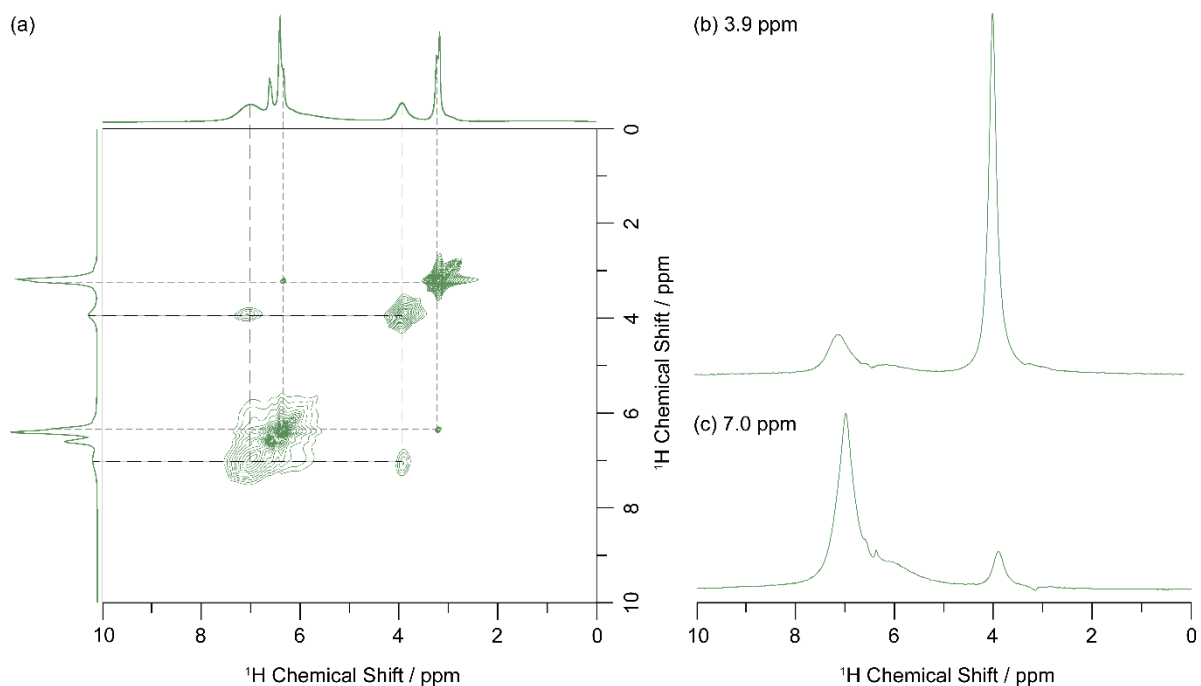

**Figure S1.** (a) 2D  $^1\text{H}$ - $^1\text{H}$  EXSY spectrum of Ads94-Nat-ZSM-5 acquired with a 20 ms mixing time at  $B_0 = 18.8$  T and  $\nu_r = 60$  kHz, displaying projections of the 2D spectra along the  $f_1$  (left) and  $f_2$  (top) dimensions. Dashed lines indicate resonances assigned to in-pore guaiacol (black long dashes) and ex-pore guaiacol (grey short dashes). (b,c) 1D spectral slices extracted at  $f_2$  chemical shifts of (b) 3.9 and (c) 7.0 ppm.

**Table S3:** BET data of AM-Nat-ZSM-5 using Ar adsorption isotherm.

| BET area<br>/ $\text{m}^2\text{g}^{-1}$ | Micropore<br>area<br>/ $\text{m}^2\text{g}^{-1}$ | Exterior<br>surface<br>area<br>/ $\text{m}^2\text{g}^{-1}$ | Pore<br>volume<br>/ $\text{cm}^3\text{g}^{-1}$ | Micropore<br>volume<br>/ $\text{cm}^3\text{g}^{-1}$ | Mesopore<br>volume<br>/ $\text{cm}^3\text{g}^{-1}$ |
|-----------------------------------------|--------------------------------------------------|------------------------------------------------------------|------------------------------------------------|-----------------------------------------------------|----------------------------------------------------|
| 447                                     | 404                                              | 43                                                         | 0.24                                           | 0.15                                                | 0.09                                               |

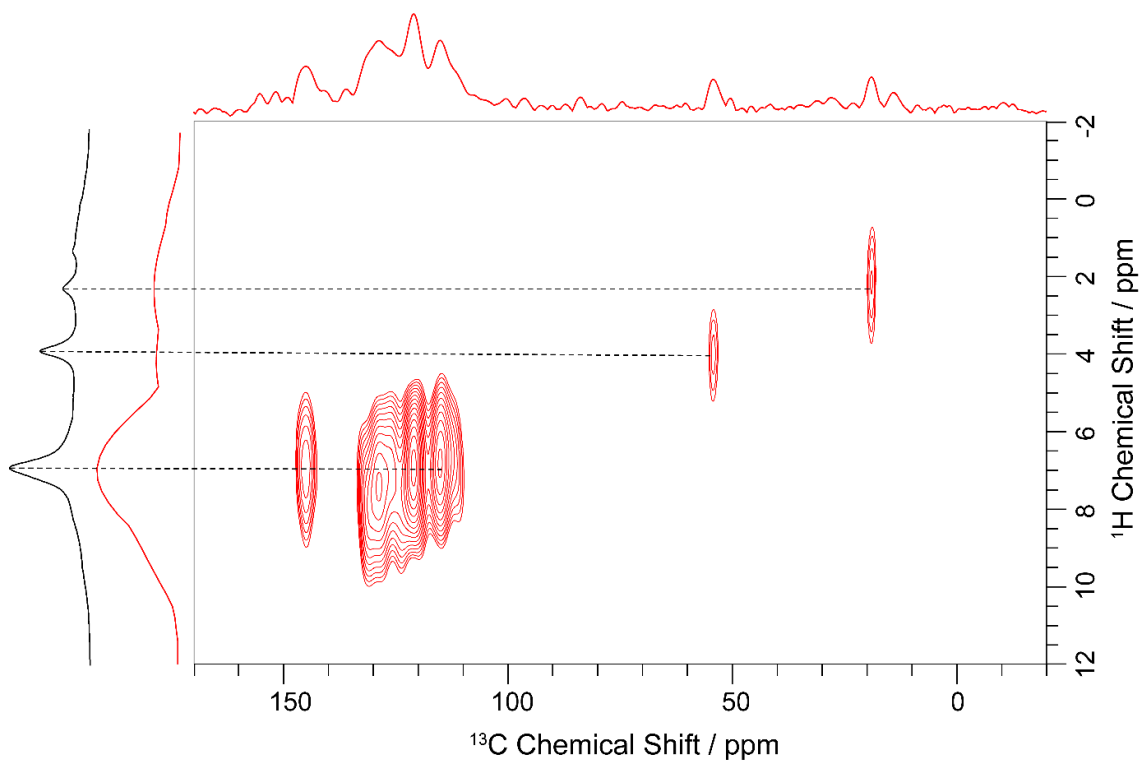

**Figure S2.**  $^{13}\text{C}$ - $^1\text{H}$  HETCOR of Act-Nat-ZSM-5 recording with a 2 ms contact time at  $B_0 = 9.4$  T and  $\nu_r = 10$  kHz. Internal projections (red) are presented with the  $^1\text{H}$  MAS NMR spectrum (black, Figure 1 g) to guide spectral assignments.

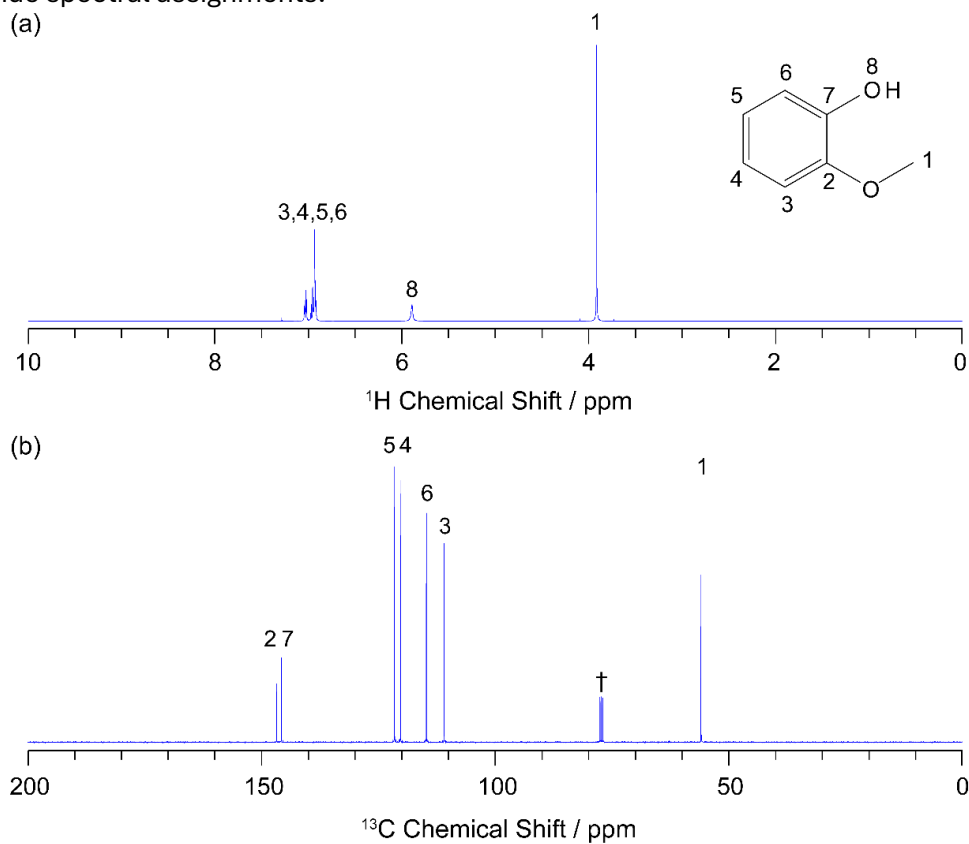

**Figure S3.** (a) Liquid  $^1\text{H}$  NMR spectrum and (b)  $^{13}\text{C}$   $\{^1\text{H}\}$  NMR spectrum of guaiacol in  $\text{CDCl}_3$ . Dagger ( $\dagger$ ) indicates solvent peak.

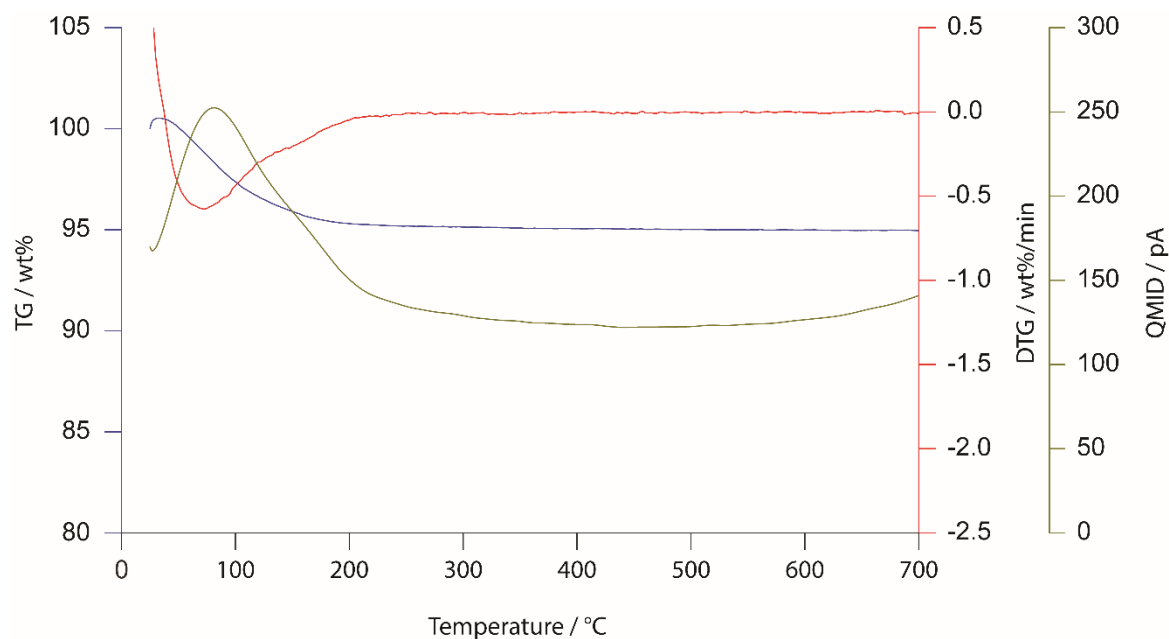

**Figure S4.** Thermogravimetric analysis of Am-NatA-ZSM-5 with TG (blue), DTG (red) and QMID ion current curve for m/z 18 (olive).

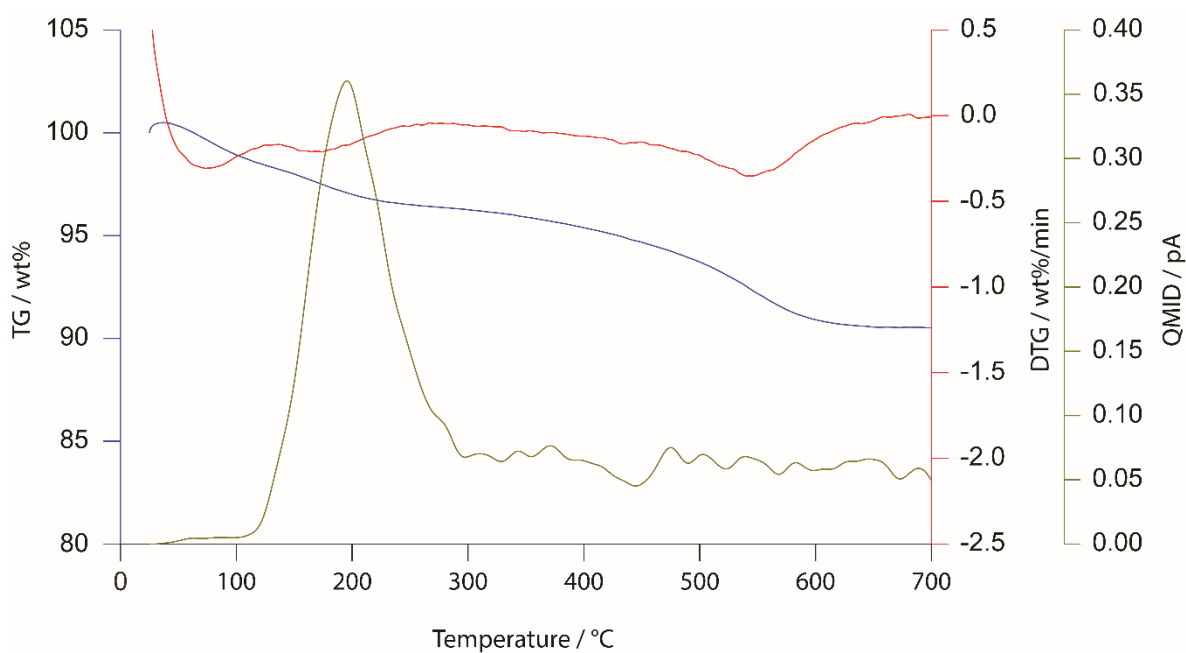

**Figure S5.** Thermogravimetric analysis of Act-NatA-ZSM-5 with TG (blue), DTG (red) and QMID ion current curve for m/z 124 (olive).

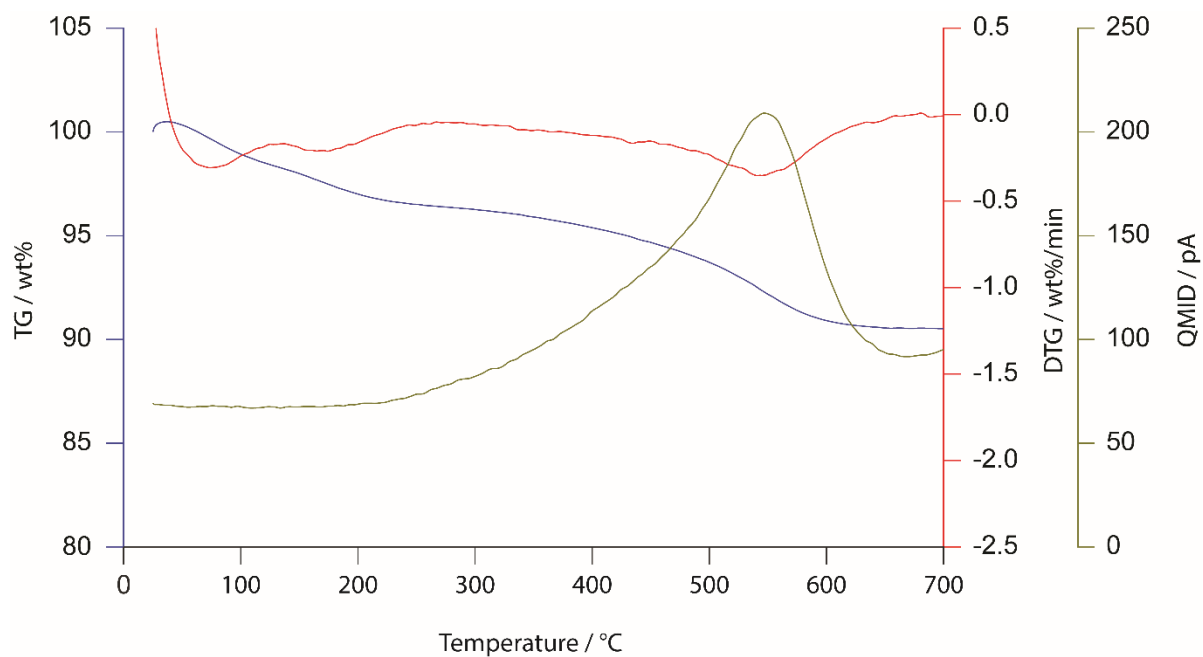

**Figure S6.** Thermogravimetric analysis of Act-NatA-ZSM-5 with TG (blue), DTG (red) and QMID ion current curve for m/z 44 (olive).

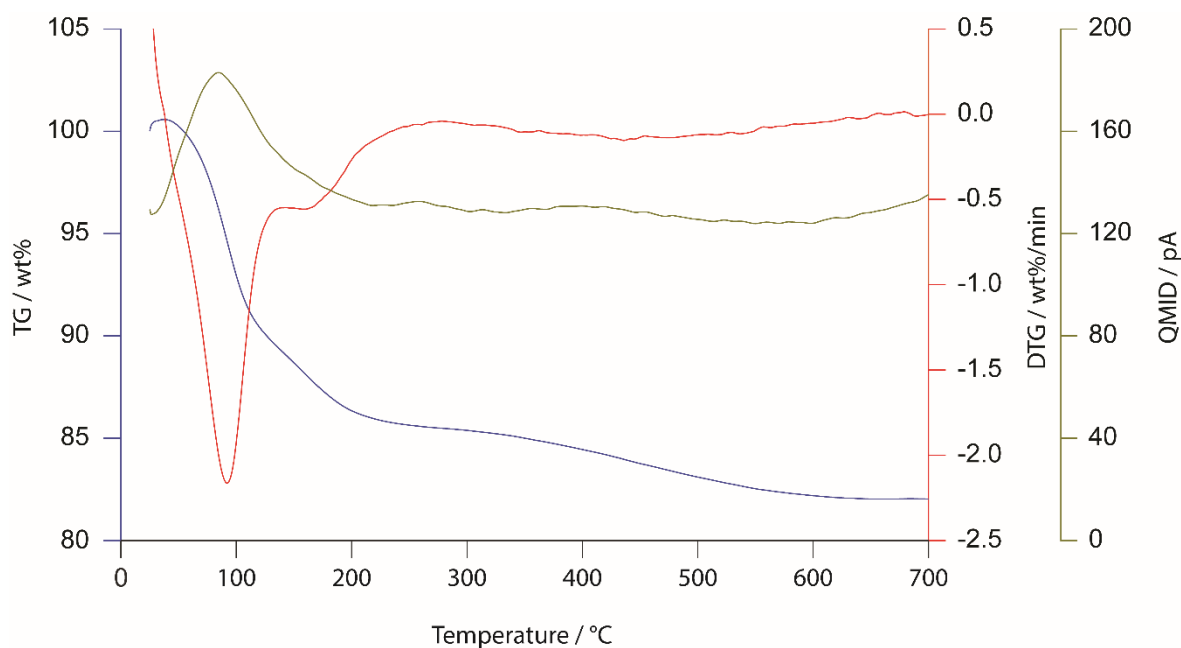

**Figure S7.** Thermogravimetric analysis of Ads94-NatA-ZSM-5 with TG (blue), DTG (red) and QMID ion current curve for m/z 18 (olive).

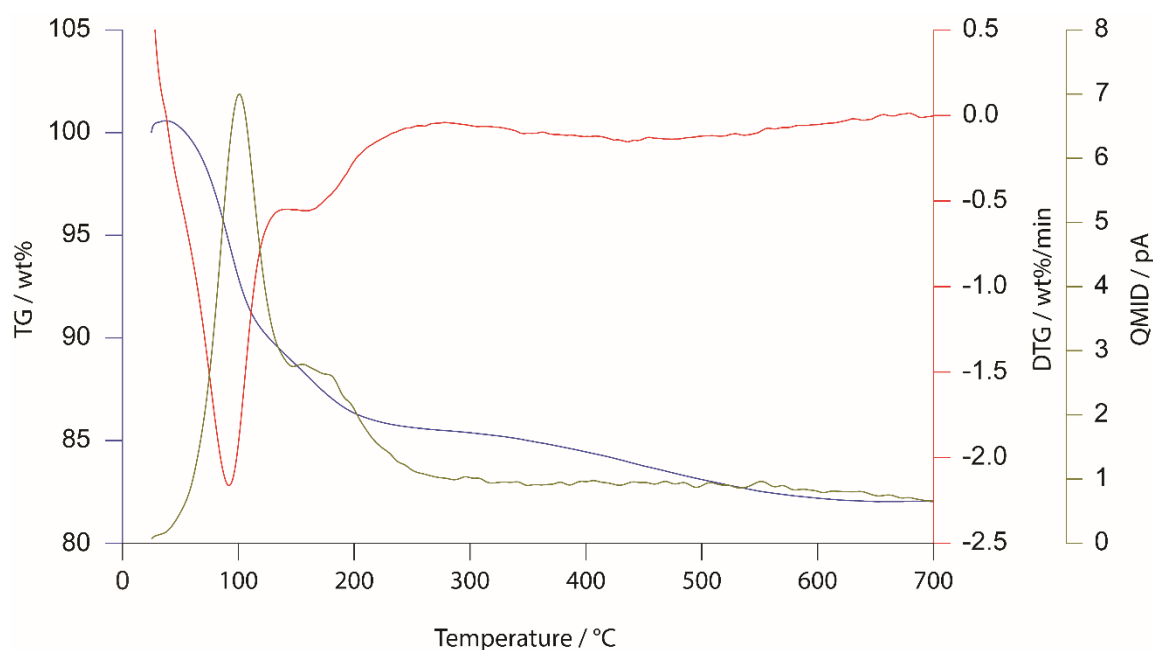

**Figure S8.** Thermogravimetric analysis of Ads94-NatA-ZSM-5 with TG (blue), DTG (red) and QMID ion current curve for m/z 124 (olive).

**Table S4.** Products of guaiacol pyrolysis reaction catalysed by Act-<sup>17</sup>O(500)-ZSM-5 categorised by oxygen content, number of aromatic rings and structural groups expressed as a percentage of peak area of identified peaks. Values are averaged over three reproducible pyrolysis experiments and used to determine the errors.

| <b>Oxygen content (peak area% of identified peaks).</b>           |             |                             |              |            |
|-------------------------------------------------------------------|-------------|-----------------------------|--------------|------------|
| Oxygenated Products / %                                           |             | Non-Oxygenated Products / % |              |            |
| 52.0 ± 2.7                                                        |             | 48.0 ± 2.7                  |              |            |
| <b>Number of aromatic rings (peak area% of identified peaks).</b> |             |                             |              |            |
| 1 ring / %                                                        | 2 rings / % | 3 rings / %                 | 4 rings / %  |            |
| 53.3 ± 0.9                                                        | 38.2 ± 0.4  | 8.3 ± 1.0                   | 0.2 ± 0.1    |            |
| <b>Structural composition (peak area% of identified peaks).</b>   |             |                             |              |            |
| BTEX / %                                                          | Phenols / % | Naphthalenes / %            | Guaiacol / % | Others / % |
| 12.0 ± 0.7                                                        | 34.3 ± 0.4  | 22.0 ± 3.4                  | 0.0          | 31.8 ± 3.3 |

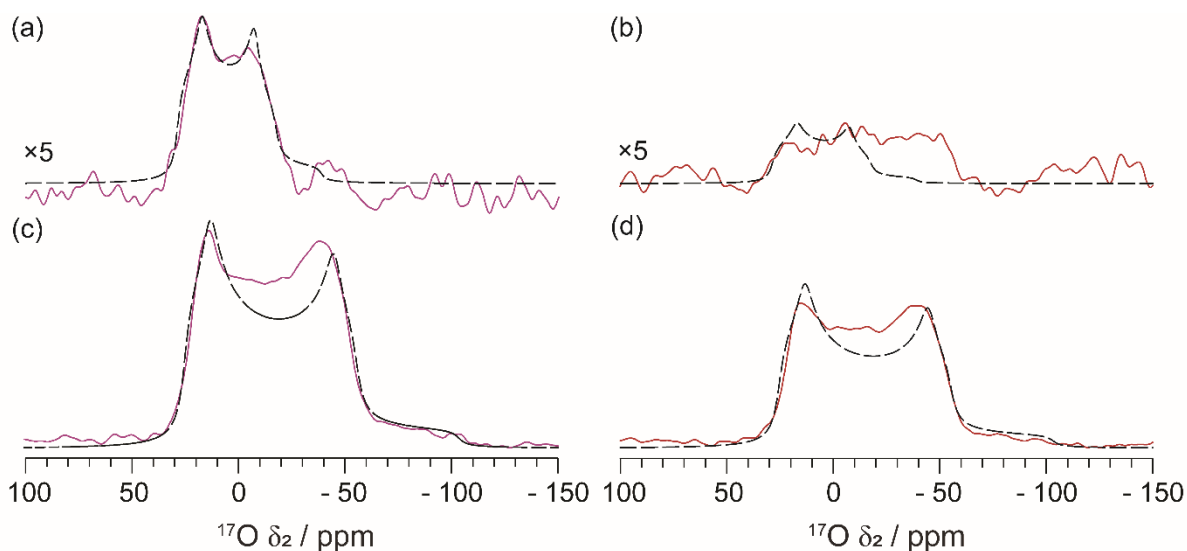

**Figure S9.** Comparison of the one dimensional  $^{17}\text{O}$  MAS NMR line shape at (a,b)  $\delta_1 = 50$  ppm (Si-O-Al region) scaled by a factor of 5 and (c,d)  $\delta_1 = 75$  ppm (Si-O-Si region) in the  $^{17}\text{O}$  MQMAS spectra (Figure 4 c,d) of (a,c, purple) Am- $^{17}\text{O}$ (500)-ZSM-5 and (b,d, red) Act- $^{17}\text{O}$ (500)-ZSM-5. The experimental spectra are shown as solid coloured lines, with corresponding simulations overlaid as black dashed lines.

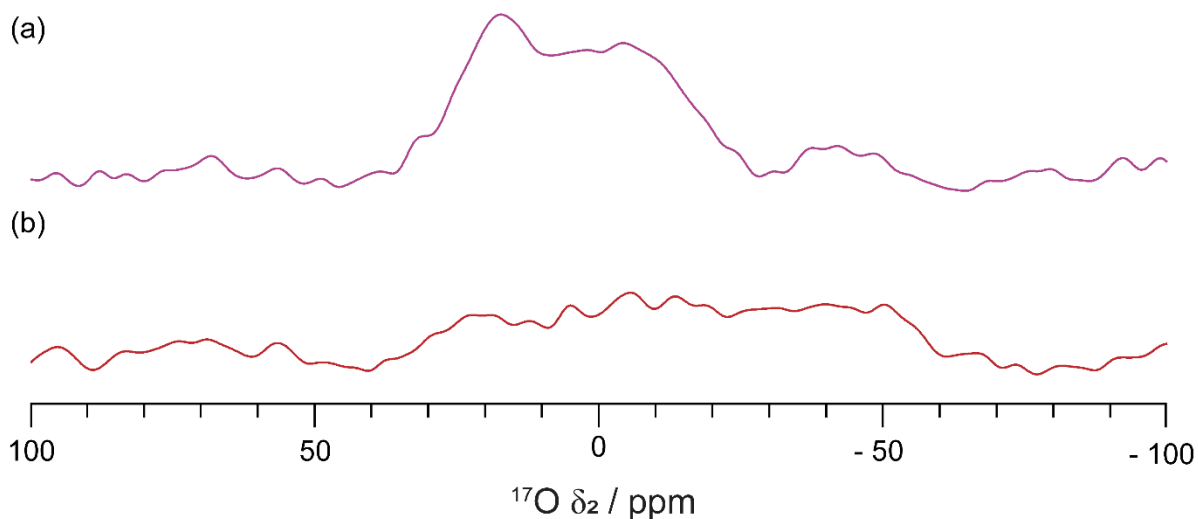

**Figure S10.** Comparison of the one dimensional  $^{17}\text{O}$  MAS NMR line shape at  $\delta_1 = 50$  ppm in the  $^{17}\text{O}$  MQMAS data (Figure 4 c,d) in the range of the Si-O-Al environment of (a) Am- $^{17}\text{O}$ (500)-ZSM-5 and (b) Act- $^{17}\text{O}$ (500)-ZSM-5.

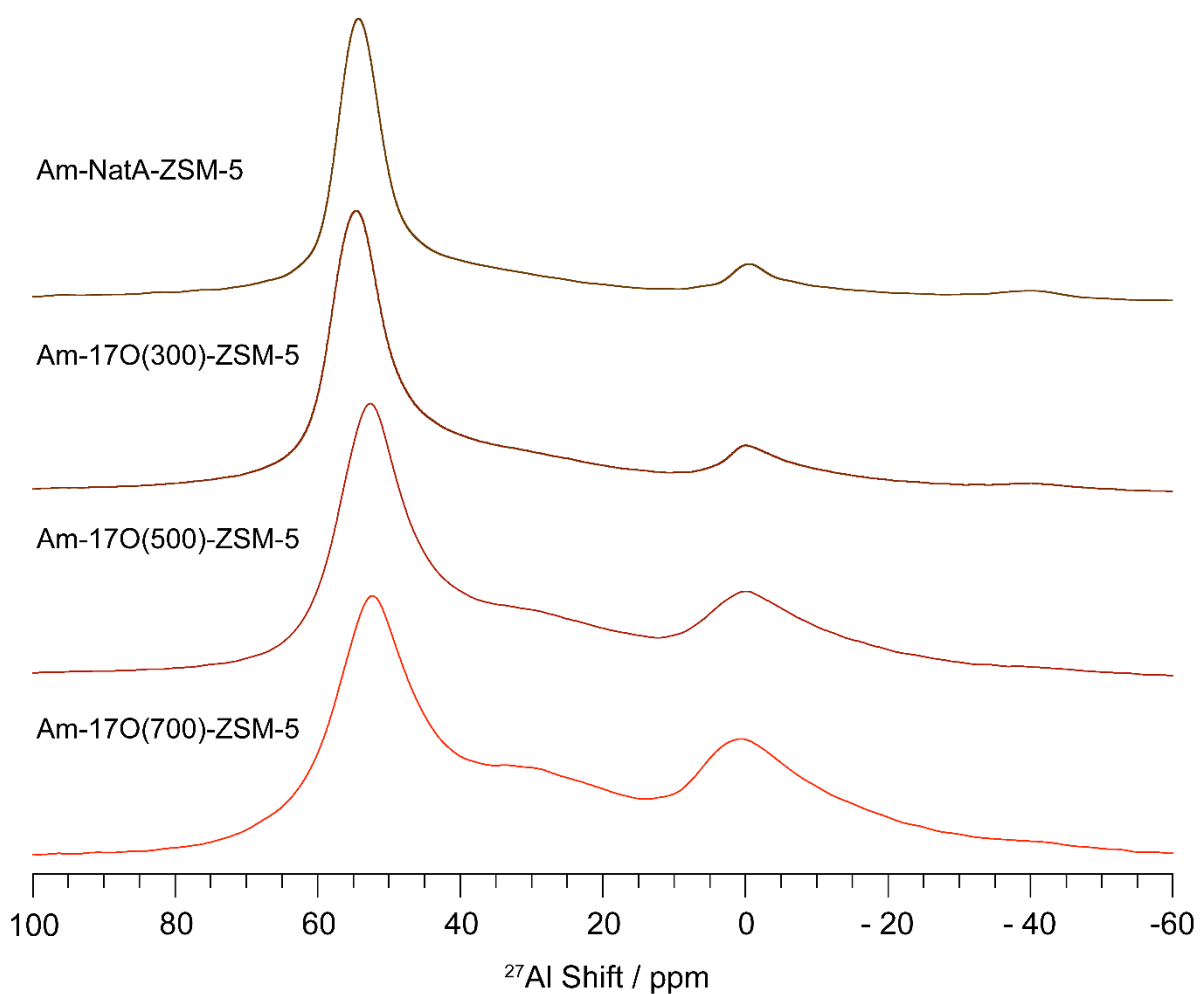

**Figure S11.**  $^{27}\text{Al}$  MAS NMR spectrum of Am-NatA-ZSM-5 and after  $^{17}\text{O}$  enrichment at various temperatures as indicated. Data were acquired at  $B_0 = 9.4$  T and with  $\nu_r = 10$  kHz.

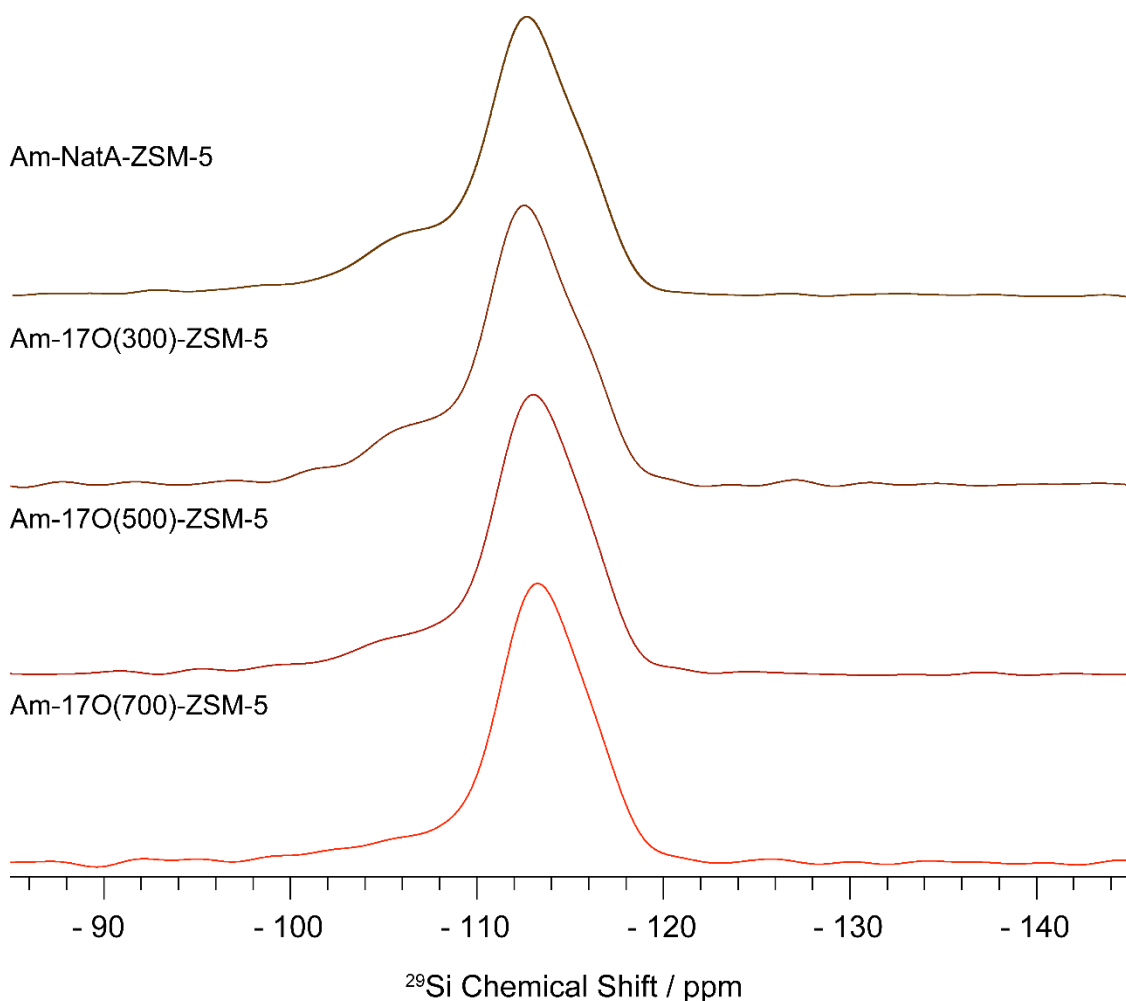

**Figure S12.**  $^{29}\text{Si}$  MAS NMR spectrum of Am-NatA-ZSM-5 and after  $^{17}\text{O}$  enrichment at various temperatures as indicated. Data were acquired at  $B_0 = 9.4$  T and with  $\nu_r = 10$  kHz.

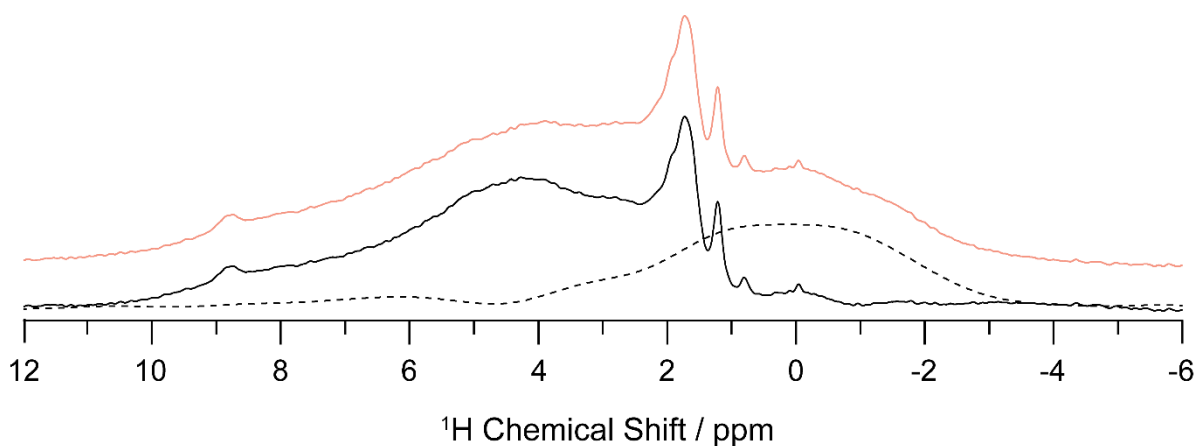

**Figure S13.**  $^1\text{H}$  MAS NMR spectra acquired at  $B_0 = 20.0$  T and with  $\nu_r = 16$  kHz for De-NatA-ZSM-5 (orange) and an empty rotor (black dashed line). The difference (black solid line) between the sample and background spectra is also shown for illustration.

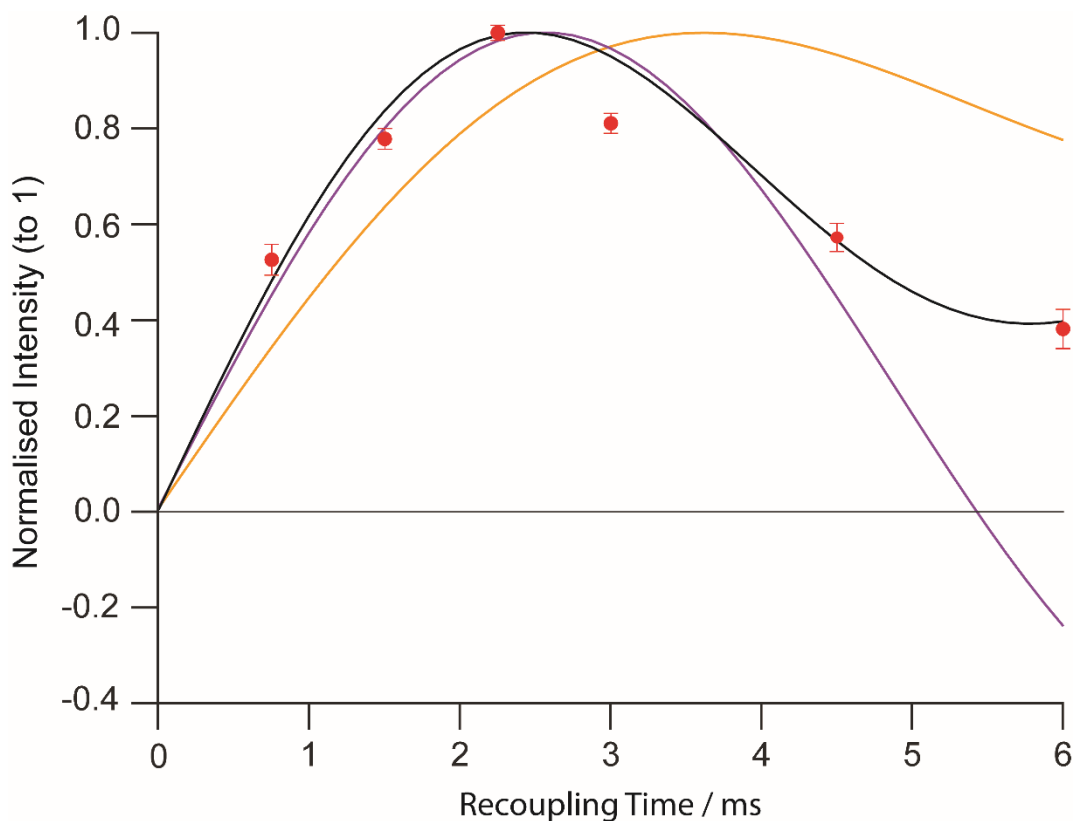

**Figure S14.**  $^1\text{H}$  signal amplitude build-up curves of Act- $^{17}\text{O}$ (500)-ZSM-5 in the 2D  $^1\text{H}$ - $^{17}\text{O}$  HMQC spectra (at  $^{17}\text{O}$  shift = 30 ppm) as a function of recoupling times for signal at 6.9 ppm (red points). A SIMPSON numerical simulation of the build-up curve for a two-spin  $^1\text{H}$ - $^{17}\text{O}$  system with a dipolar coupling constant of 100 Hz is shown with a purple line. Further simulations with an additional  $^1\text{H}$  spin with a dipolar coupling constant of 300 Hz and a  $^1\text{H}$ - $^{17}\text{O}$  dipolar coupling constant of 100 and 130 Hz are shown with yellow and black lines respectively.

A simpler two-spin model with a  $^1\text{H}$ - $^{17}\text{O}$  dipolar coupling constant of 100 Hz (Figure S14, purple) adequately reproduces the initial build-up but exhibits a substantially faster decay than observed experimentally. The incorporation of a second  $^1\text{H}$  spin, dipolar-coupled (300 Hz) to the primary  $^1\text{H}$ , significantly improves the agreement between simulation and experiment, highlighting the importance of homonuclear proton-proton interactions in modulating the D-HMQC transfer efficiency.

## References

1. T. C. Hoff, R. Thilakaratne, D. W. Gardner, R. C. Brown and J.-P. Tessonnier, Thermal stability of aluminum-rich ZSM-5 zeolites and consequences on aromatization reactions, *J. Phys. Chem. C*, 2016, **120**, 20103–20113.
2. U. Schwerk and D. Michel, <sup>1</sup>H NOESY NMR on adsorbed molecules, *J. Phys. Chem.*, 1996, **100**, 352–356.
3. B. M. Fung, A. K. Khitrin and K. Ermolaev, An improved broadband decoupling sequence for liquid crystals and solids, *J. Magn. Reson.*, 2000, **142**, 97–101.
4. A. Medek, J. S. Harwood and L. Frydman, Multiple-quantum magic-angle spinning NMR: A new method for the study of quadrupolar nuclei in solids, *J. Am. Chem. Soc.*, 1995, **117**, 12779–12787.
5. J.-P. Amoureux, C. Fernandez and S. Steuernagel, ZFiltering in MQMAS NMR, *J. Magn. Reson., Ser. A*, 1996, **123**, 116–118.
6. Y. Millot and P. P. Man, Procedures for labeling the high-resolution axis of two-dimensional MQ-MAS NMR spectra of half-integer quadrupole spins, *Solid State Nucl. Magn. Reson.*, 2002, **21**, 21–43.
7. O. Lafon, Q. Wang, B. Hu, F. Vasconcelos, J. Trébosc, S. Cristol, F. Deng and J.-P. Amoureux, Indirect detection via spin-1/2 nuclei in solid state NMR spectroscopy: Application to the observation of proximities between protons and quadrupolar nuclei, *J. Phys. Chem. A*, 2009, **113**, 12864–12878.
8. C. R. Morcombe and K. W. Zilm, Chemical shift referencing in MAS solid state NMR, *J. Magn. Reson.*, 2003, **162**, 479–486.
9. E. Lippmaa, M. Maegi, A. Samoson, M. Tarmak and G. Engelhardt, Investigation of the structure of zeolites by solid-state high-resolution <sup>29</sup>Si NMR spectroscopy, *J. Am. Chem. Soc.*, 1981, **103**, 4992–4996.
10. M. Bak, J. T. Rasmussen and N. C. Nielsen, SIMPSON: A general simulation program for solid-state NMR spectroscopy, *J. Magn. Reson.*, 2000, **147**, 296–330.
11. D. Iuga, E. K. Corlett and S. P. Brown, <sup>35</sup>Cl–<sup>1</sup>H Heteronuclear correlation magic-angle spinning nuclear magnetic resonance experiments for probing pharmaceutical salts, *Magn. Reson. Chem.*, 2021, **59**, 1089–1100.
12. J. M. Koons, E. Hughes, H. M. Cho and P. D. Ellis, Extracting multitensor solid-state NMR parameters from lineshapes, *J. Magn. Reson., Ser. A*, 1995, **114**, 12–23.
